# Supplementary material for: Modelling accessibility of adult neurology care in Australia, 2020–2034
Source: HighWire-hosted journal article supplement (doi:10.1136/bmjno-2023-000407), 2023-04-01
Supplement: bmjno-2023-000407supp001_data_supplement.pdf [file bmjno-2023-000407supp001_data_supplement.pdf]

## Appendices

Supplemental Table 1. Estimated new and review patient load, Australia, 2020.

|                                | Initial patients                |                                  |                                         |                   |                          | Review patients                 |                            |                                 |                                |                  |                         |
|--------------------------------|---------------------------------|----------------------------------|-----------------------------------------|-------------------|--------------------------|---------------------------------|----------------------------|---------------------------------|--------------------------------|------------------|-------------------------|
|                                | Prop. Likely to see neurologist | Initial encounter duration, min. | Incidence rate per 100,000 person-years | Initial case load | Initial case load, hours | Prop. likely to see neurologist | Review encounter frequency | Review encounter duration, min. | Prevalence per 100,000 persons | Review case load | Review case load, hours |
| <b>Autoimmune encephalitis</b> | 30%                             | 60                               | 0.80 <sup>1</sup>                       | 61.69             | 61.69                    | 30%                             | 3                          | 30                              | 13.70 <sup>1</sup>             | 3,169.38         | 554.64                  |
| <b>Nervous system cancers</b>  | 60%                             | 60                               | 7.20 <sup>2</sup>                       | 1,110.44          | 1,110.44                 |                                 |                            |                                 |                                |                  |                         |
| <b>Traumatic brain injury</b>  | 5%                              | 60                               | 939.00 <sup>3</sup>                     | 12,068.31         | 12,068.31                | 5%                              | 1                          | 30                              | 12111.08 <sup>4</sup>          | 155,655.31       | 77,827.66               |

|                                          |      |    |                      |           |           |      |   |    |                        |             |            |
|------------------------------------------|------|----|----------------------|-----------|-----------|------|---|----|------------------------|-------------|------------|
| <b>CIDP and chronic neuropathies</b>     | 100% | 40 | 0.33 <sup>5</sup>    | 84.83     | 56.55     | 100% | 2 | 20 | 2.81 <sup>5</sup>      | 1,444.60    | 481.53     |
| <b>Encephalitis, infectious</b>          | 5%   | 60 | 5.00 <sup>2</sup>    | 64.26     | 64.26     | 0%   |   |    |                        |             |            |
| <b>Epilepsy</b>                          | 100% | 40 | 61.44 <sup>6</sup>   | 15,792.91 | 10,528.61 | 50%  | 2 | 20 | 638.00 <sup>6</sup>    | 163,995.37  | 54,665.12  |
| <b>Functional neurological disorders</b> | 100% | 60 | 29.50 <sup>7</sup>   | 7,582.86  | 7,582.86  | 20%  | 2 | 30 | 37.20 <sup>7</sup>     | 3,824.84    | 286.86     |
| <b>Guillain-Barre</b>                    | 100% | 40 | 1.11 <sup>8</sup>    | 285.32    | 190.21    | 50%  | 2 | 20 | 1.90 <sup>9</sup>      | 488.39      | 24.42      |
| <b>Migraine</b>                          | 15%  | 40 | 810.00 <sup>10</sup> | 31,231.09 | 20,820.73 | 15%  | 2 | 20 | 15000.00 <sup>11</sup> | 1,156,707.1 | 385,569.05 |
| <b>Motor neurone disease</b>             | 100% | 40 | 0.78 <sup>12</sup>   | 200.50    | 133.66    | 100% | 3 | 30 | 4.50 <sup>12</sup>     | 3,470.12    | 1,735.06   |

|                                               |      |    |                                 |           |           |      |   |    |                                   |                  |           |
|-----------------------------------------------|------|----|---------------------------------|-----------|-----------|------|---|----|-----------------------------------|------------------|-----------|
| <b>Multiple sclerosis and neuroimmunology</b> | 100% | 60 | 3.30 <sup>2</sup>               | 848.25    | 848.25    | 100% | 2 | 30 | 103.70 <sup>13</sup>              | 53,311.35        | 26,655.67 |
| <b>Myasthenia gravis</b>                      | 100% | 60 | 0.53 <sup>14</sup>              | 136.23    | 136.23    | 100% | 2 | 30 | 7.77 <sup>14</sup>                | 3,994.50         | 1,997.25  |
| <b>Myopathies, inflammatory</b>               | 50%  | 60 | 0.80 <sup>15</sup>              | 102.56    | 102.56    | 0%   |   |    |                                   |                  |           |
| <b>Neurocognitive disorders</b>               | 20%  | 60 | 923.06 <sup>16</sup><br>(60+yo) | 10,615.09 | 10,615.09 | 10%  | 1 | 30 | 13402.35 <sup>17</sup><br>(65+yo) | 57,577.14        | 28,788.57 |
| <b>Optic neuritis</b>                         | 50%  | 60 | 3.70 <sup>18</sup>              | 475.54    | 475.54    | 0%   |   |    |                                   |                  |           |
| <b>Pain (neuropathic, vertebrogenic)</b>      | 5%   | 40 | 820.00 <sup>19</sup>            | 10,538.89 | 7,025.92  | 5%   | 2 | 20 | 9,800.00 <sup>20</sup>            | 2,519,051.0<br>9 | 83,968.37 |

|                                                     |     |    |                                  |           |           |     |   |    |                          |            |            |
|-----------------------------------------------------|-----|----|----------------------------------|-----------|-----------|-----|---|----|--------------------------|------------|------------|
| <b>Parkinson's disease &amp; Movement disorders</b> | 90% | 60 | 13.43 <sup>21</sup>              | 3,106.92  | 3,106.92  | 90% | 2 | 60 | 106.28 <sup>21</sup>     | 124,574.40 | 124,574.40 |
| <b>Peripheral nerve injuries</b>                    | 50% | 60 | 13.90 <sup>22</sup>              | 1,786.47  | 1,786.47  | 0%  |   |    |                          |            |            |
| <b>Peripheral neuropathy/ neuritis</b>              | 10% | 60 | 790.00 <sup>23</sup>             | 20,306.64 | 20,306.64 | 10% | 2 | 30 | 2360.00 <sup>23 24</sup> | 121,325.73 | 60,662.86  |
| <b>Sleep disorders</b>                              |     |    |                                  |           |           | 5%  | 1 | 20 | 6947.17 <sup>25</sup>    | 89,287.18  | 29,762.39  |
| <b>Obstructive sleep apnoea</b>                     | 5%  | 40 | 139.2 <sup>0 26</sup>            | 1,789.04  | 1,192.69  |     |   |    |                          |            |            |
| <b>Insomnia</b>                                     | 5%  | 40 | 1842.95 <sup>27</sup><br>(35+yo) | 12,933.84 | 8,622.56  |     |   |    |                          |            |            |

|                                                            |     |    |                      |           |           |     |   |    |                       |             |          |            |
|------------------------------------------------------------|-----|----|----------------------|-----------|-----------|-----|---|----|-----------------------|-------------|----------|------------|
| <b>Spinal cord injury</b>                                  | 5%  | 60 | 1.45 <sup>28</sup>   | 372.72    | 18.64     | 0%  |   |    |                       |             |          |            |
| <b>Stroke</b>                                              | 95% | 40 | 159.00 <sup>29</sup> | 38,762.54 | 36,824.41 | 5%  | 1 | 20 | 1316.30 <sup>29</sup> | 2,043.50    | 681.17   |            |
| <b>Transverse myelitis</b>                                 | 95% | 60 | 3.10 <sup>30</sup>   | 796.84    | 757.00    | 0%  |   |    |                       |             |          |            |
| <b>Trigeminal neuralgia</b>                                | 50% | 40 | 9.90 <sup>31</sup>   | 2,544.76  | 1,272.38  | 50% | 4 | 20 | 9.90 <sup>32</sup>    | 7,922.16    | 2,640.72 |            |
|                                                            |     |    |                      |           |           |     |   |    |                       |             |          |            |
| Total                                                      |     |    |                      | 172,099.0 | 134,447.2 |     |   |    |                       | 2,200,696.2 | 0        | 880,875.74 |
| Abbreviations:<br>CIDP= Chronic inflammatory demyelinating |     |    |                      |           |           |     |   |    |                       |             |          |            |

|                             |  |  |  |  |  |  |  |  |  |  |  |
|-----------------------------|--|--|--|--|--|--|--|--|--|--|--|
| polyradiculoneuro<br>pathy. |  |  |  |  |  |  |  |  |  |  |  |
|-----------------------------|--|--|--|--|--|--|--|--|--|--|--|

Supplemental Table 2. Estimated new and review patient load, Australia, 2034. This estimate is based on the current epidemiological data, projected for the forecasted population growth.

|                                | Initial patients             |                        |                     |                   |                          | Review patients              |                   |                        |                       |                  |                         |
|--------------------------------|------------------------------|------------------------|---------------------|-------------------|--------------------------|------------------------------|-------------------|------------------------|-----------------------|------------------|-------------------------|
|                                | Prop. likely see neurologist | Consult duration, min. | Incidence rate      | Initial case load | Initial case load, hours | Prop. likely see neurologist | Consult frequency | Consult duration, min. | Prevalence            | Review case load | Review case load, hours |
| <b>Autoimmune encephalitis</b> | 30%                          | 60                     | 0.80 <sup>1</sup>   | 78.52             | 78.52                    | 30%                          | 3                 | 30                     | 13.70 <sup>1</sup>    | 4,033.87         | 705.93                  |
| <b>Nervous system cancers</b>  | 60%                          | 60                     | 7.20 <sup>2</sup>   | 1,413.33          | 1,413.33                 |                              |                   |                        |                       |                  | 0.00                    |
| <b>Traumatic brain injury</b>  | 5%                           | 60                     | 939.00 <sup>3</sup> | 15,360.11         | 15,360.11                | 5%                           | 1                 | 30                     | 12111.08 <sup>4</sup> | 198,112.46       | 99,056.23               |

|                                          |      |    |                      |           |           |      |   |    |                            |                  |            |
|------------------------------------------|------|----|----------------------|-----------|-----------|------|---|----|----------------------------|------------------|------------|
| <b>CIDP and chronic neuropathies</b>     | 100% | 40 | 0.33 <sup>5</sup>    | 107.96    | 71.97     | 100% | 2 | 20 | 2.81 <sup>5</sup>          | 1,838.63         | 612.88     |
| <b>Encephalitis, infectious</b>          | 5%   | 60 | 5.00 <sup>2</sup>    | 81.79     | 81.79     | 0%   |   |    |                            |                  |            |
| <b>Epilepsy</b>                          | 100% | 40 | 61.44 <sup>6</sup>   | 20,100.64 | 13,400.43 | 50%  | 2 | 20 | 638.00 <sup>6</sup>        | 208,727.38       | 69,575.79  |
| <b>Functional neurological disorders</b> | 100% | 60 | 29.50 <sup>7</sup>   | 9,651.19  | 9,651.19  | 20%  | 2 | 30 | 37.20 <sup>7</sup>         | 4,868.12         | 365.11     |
| <b>Guillain-Barre</b>                    | 100% | 40 | 1.11 <sup>8</sup>    | 363.15    | 242.10    | 50%  | 2 | 20 | 1.90 <sup>9</sup>          | 621.60           | 31.08      |
| <b>Migraine</b>                          | 15%  | 40 | 810.00 <sup>10</sup> | 39,749.81 | 26,499.87 | 15%  | 2 | 20 | 15000.00 <sup>1</sup><br>1 | 1,472,215.0<br>5 | 490,738.35 |
| <b>Motor neurone disease</b>             | 100% | 40 | 0.78 <sup>12</sup>   | 255.18    | 170.12    | 100% | 3 | 30 | 4.50 <sup>12</sup>         | 4,416.65         | 2,208.32   |



|                                               |      |    |                                 |           |           |      |   |    |                                       |            |            |
|-----------------------------------------------|------|----|---------------------------------|-----------|-----------|------|---|----|---------------------------------------|------------|------------|
| <b>Multiple sclerosis and neuroimmunology</b> | 100% | 60 | 3.30 <sup>2</sup>               | 1,079.62  | 1,079.62  | 100% | 2 | 30 | 103.70 <sup>13</sup>                  | 67,852.76  | 33,926.38  |
| <b>Myasthenia gravis</b>                      | 100% | 60 | 0.53 <sup>14</sup>              | 173.39    | 173.39    | 100% | 2 | 30 | 7.77 <sup>14</sup>                    | 5,084.05   | 2,542.02   |
| <b>Myopathies, inflammatory</b>               | 50%  | 60 | 0.80 <sup>15</sup>              | 130.54    | 130.54    | 0%   |   |    |                                       |            |            |
| <b>Neurocognitive disorders</b>               | 20%  | 60 | 923.06 <sup>16</sup><br>(60+yo) | 13,510.48 | 13,510.48 | 10%  | 1 | 30 | 13402.35 <sup>1</sup><br>7<br>(65+yo) | 73,282.11  | 36,641.05  |
| <b>Optic neuritis</b>                         | 50%  | 60 | 3.70 <sup>18</sup>              | 605.24    | 605.24    | 0%   |   |    |                                       |            |            |
| <b>Pain (neuropathic, vertebrogenic)</b>      | 5%   | 40 | 820.00 <sup>19</sup>            | 13,413.51 | 8,942.34  | 5%   | 2 | 20 | 9,800.00 <sup>20</sup>                | 320,615.72 | 106,871.91 |

|                                             |     |    |                          |           |           |     |   |    |                             |            |            |
|---------------------------------------------|-----|----|--------------------------|-----------|-----------|-----|---|----|-----------------------------|------------|------------|
| <b>Parkinson's &amp; Movement disorders</b> | 90% | 60 | 13.43 <sup>21</sup>      | 3,954.37  | 3,954.37  | 90% | 2 | 60 | 106.28 <sup>21</sup>        | 124,574.40 | 124,574.40 |
| <b>Peripheral nerve injuries</b>            | 50% | 60 | 13.90 <sup>22</sup>      | 2,273.75  | 2,273.75  | 0%  |   |    |                             |            |            |
| <b>Peripheral neuropathy/ neuritis</b>      | 10% | 60 | 790.00 <sup>23</sup>     | 25,845.55 | 25,845.55 | 10% | 2 | 30 | 2360.00 <sup>23</sup><br>24 | 154,419.00 | 77,209.50  |
| <b>Sleep disorders</b>                      |     |    |                          |           |           | 5%  | 1 | 20 | 6947.17 <sup>25</sup>       | 113,641.49 | 37,880.50  |
| <b>Obstructive sleep apnoea</b>             | 5%  | 40 | 139.20 <sup>26</sup>     | 2,277.03  | 1,518.02  |     |   |    |                             |            |            |
| <b>Insomnia</b>                             | 5%  | 40 | 1842.95<br>27<br>(35+yo) | 16,461.72 | 10,974.48 |     |   |    |                             |            |            |

|                                                                                    |     |    |                      |           |           |     |   |    |                       |             |            |
|------------------------------------------------------------------------------------|-----|----|----------------------|-----------|-----------|-----|---|----|-----------------------|-------------|------------|
| <b>Spinal cord injury</b>                                                          | 5%  | 60 | 1.45 <sup>28</sup>   | 23.72     | 23.72     | 0%  |   |    |                       |             |            |
| <b>Stroke</b>                                                                      | 95% | 40 | 159.00 <sup>29</sup> | 49,417.07 | 32,944.71 | 5%  | 1 | 20 | 1316.30 <sup>29</sup> | 2,600.90    | 866.97     |
| <b>Transverse myelitis</b>                                                         | 95% | 60 | 3.10 <sup>30</sup>   | 963.48    | 963.48    | 0%  |   |    |                       |             |            |
| <b>Trigeminal neuralgia</b>                                                        | 50% | 40 | 9.90 <sup>31</sup>   | 1,619.44  | 1,079.62  | 50% | 4 | 20 | 9.90 <sup>32</sup>    | 10,083.04   | 3,361.01   |
|                                                                                    |     |    |                      |           |           |     |   |    |                       |             |            |
| Total                                                                              |     |    |                      | 219,041.4 | 171,119.6 |     |   |    |                       | 2,766,987.2 | 1,087,167. |
|                                                                                    |     |    |                      | 7         | 3         |     |   |    |                       | 2           | 43         |
| Abbreviations:<br>CIDP= Chronic inflammatory demyelinating polyradiculoneuropathy. |     |    |                      |           |           |     |   |    |                       |             |            |

Supplemental Table 3. Estimating number of Active Neurology Consultant Fellows of the RACP, practicing in Adult Neurology in Australia from RACP Internal

Membership Reports.

|                                | 2020 <sup>33</sup>                   | 2019 <sup>34</sup>                   |
|--------------------------------|--------------------------------------|--------------------------------------|
| RACP Members                   | 27,843                               | 26,761                               |
| In Australia                   | 23,303 (83.7%)                       | 22,330 (83.4%)                       |
| RACP Fellows                   | 18,863 (67.8%)                       | 18,071 (67.5%)                       |
| Active RACP Fellows            | 17,160 (61.6%)<br>(91.0% of Fellows) | 16,435 (61.4%)<br>(91.0% of Fellows) |
| Australian RACP Fellows        | 15,641 (82.9%)                       | 14,919 (66.8%)                       |
| Australian Active RACP Fellows | 14,436 (51.8%)                       | 13,774 (51.5%)                       |
|                                |                                      |                                      |
| Australian Active RACP Fellows | 14,436                               | 13,774                               |
| Major Urban                    | 12,685 (87.9%)                       | 12,133 (88.1%)                       |
| Inner Regional                 | 1,235 (8.6%)                         | 1,150 (8.3%)                         |
| Outer Regional                 | 445 (3.1%)                           | 424 (3.1%)                           |

|                                                                                                                                                            |                       |                       |
|------------------------------------------------------------------------------------------------------------------------------------------------------------|-----------------------|-----------------------|
| Remote                                                                                                                                                     | 70 (0.5%)             | 65 (0.5%)             |
|                                                                                                                                                            |                       |                       |
| Neurology                                                                                                                                                  | 960                   | 901                   |
| Adult Neurology practitioners<br>(including non-fellows)                                                                                                   | 852 (88.8%)           | 800 (88.8%)           |
| Neurology Fellows                                                                                                                                          | 756 (78.8%)           | 710 (78.8%)           |
|                                                                                                                                                            |                       |                       |
| Neurology RACP Fellows x % in<br>Australia x % Active x % Adult<br>Neurology                                                                               | 756x83.7%x91.0%x88.8% | 710x83.4%x91.0%x88.8% |
| <b>Number of Active,<br/>Neurology RACP Fellows<br/>working in Australia who<br/>work in Adult Neurology<br/>(does not include neurology<br/>trainees)</b> | <b>511</b>            | <b>479</b>            |

Supplemental Table 4. Allocation of model parameters based on data from MBA, RACP, Medical Deans ANZ Student Statistics, and ANZAN survey.

|      | $\mu$ | $\alpha$ | M(0)  | $\lambda_m$ | T(0) | $\lambda_t$ | E(0) | $\lambda_e$ | L(0) | $s_1$         | S(0) | $s_2 + \gamma$ | Total<br>neurologists |
|------|-------|----------|-------|-------------|------|-------------|------|-------------|------|---------------|------|----------------|-----------------------|
| 2020 | 0.38  | 3,637    | 4,155 | 0.44        | 106  | 47          | 208  | 35          | 299  | 3.5 (0.9% PY) | 4    | 0.46           | 617                   |
| 2019 | 0.53  | 3,693    | 3,996 | 0           | 96   | 47          | 195  |             | 280  |               | 4    | 0.40           | 575                   |
| 2018 | 0.48  | 3,475    | 4,052 | 2           | 90   | 45          | 193  |             | 277  |               | 3    |                | 564                   |
| 2017 |       | 3,569    | 3,569 |             | 83   | 22          | 187  |             | 267  |               | 3    |                | 540                   |
| 2016 |       | 3,547    |       |             |      | 1           |      |             |      |               |      |                | 422                   |
| 2015 |       | 3,437    |       |             |      | 25          |      |             |      |               |      |                | 421                   |

Number of Advanced Physician Trainees in neurology (T); Number of Early-Career neurology consultants (E): from the 2020 ANZAN survey; Number of Mid/Late-Career neurology consultants (L): from the 2020 ANZAN survey; Number of semi-retired (S): From the 2020 ANZAN survey; Immigration ( $\mu$ ):  $\mu$  is derived from data from the Medical Board of Australia international medical graduate applications; Rate of Basic Physician Trainees admitted into Advanced Neurology Trainees ( $\lambda_m$ ): from ANZAN records; Rate of Retirement: from RACP annual reports; Rates of transition from Advanced Neurology Trainee to Early-Career Neurologist ( $\lambda_t$ ) and from Early-Career Neurologist to Mid/Late-Career Neurologist ( $\lambda_e$ ) are dynamically estimated within the

function by the Total Neurology Consultant numbers and the values of the other model components; Rate of conversion from semi-retired to retired (s2) and rate of conversion to retired, emigrated, and left neurology ( $\gamma$ ).

Supplemental Table 5. ANZAN survey respondent characteristics.

|             | n (%)                          |                                                                                      |
|-------------|--------------------------------|--------------------------------------------------------------------------------------|
|             | Total survey sample<br>(n=738) | Australian, Active,<br>Working in last 12<br>months, Works with<br>adults<br>(n=577) |
| Sex         |                                |                                                                                      |
| Male        | 472 (64.0%)                    | 370 (64.1%)                                                                          |
| Female      | 265 (35.9%)                    | 206 (35.7%)                                                                          |
| Unspecified | 1 (0.1%)                       | 1 (0.2%)                                                                             |

|                             |               |               |
|-----------------------------|---------------|---------------|
| ANZAN member                |               |               |
| No                          | 6 (0.8%)      | 5 (0.9%)      |
| Yes                         | 732 (99.2%)   | 572 (99.1%)   |
| Working status              |               |               |
| Active                      | 714 (96.8%)   | 577 (100%)    |
| TNIP                        | 9 (1.2%)      |               |
| Semi-retired                | 13 (1.8%)     |               |
| Retired                     | 2 (0.3%)      |               |
| Country of secondary school |               |               |
| Australia                   | 236 (68.2%)   | 214 (72.8%)   |
| New Zealand                 | 30 (8.7%)     | 9 (3.1%)      |
| Other                       | 80 (23.1%)    | 71 (24.2%)    |
| (Missing)                   | (392 (53.1%)) | (283 (49.1%)) |
| Country of medical school   |               |               |



|                                |               |               |
|--------------------------------|---------------|---------------|
| Australia                      | 378 (70.9%)   | 332 (76.2%)   |
| New Zealand                    | 42 (7.9%)     | 8 (1.8%)      |
| Other                          | 113 (21.2%)   | 96 (22.0%)    |
| (Missing)                      | (205 (27.8%)) | (141 (24.4%)) |
| Country of specialist training |               |               |
| Australia                      | 362 (81.0%)   | 325 (87.8%)   |
| New Zealand                    | 25 (5.6%)     | 3 (0.8%)      |
| Other                          | 60 (13.4%)    | 42 (11.4%)    |
| (Missing)                      | (291 (39.4%)) | (207 (35.9%)) |
| Country of current work        |               |               |
| Australia                      | 649 (87.9%)   | 577 (100%)    |
| New Zealand                    | 58 (7.9%)     |               |
| Other                          | 31 (4.2%)     |               |

|                                                                                                               |                      |                      |
|---------------------------------------------------------------------------------------------------------------|----------------------|----------------------|
| Adult/paediatric neurology                                                                                    |                      |                      |
| Neither                                                                                                       | 29 (3.9%)            | 14 (2.4%)            |
| Adult only                                                                                                    | 692 (93.8%)          | 558 (96.7%)          |
| Paediatric only                                                                                               | 11 (1.5%)            | 0 (0%)               |
| Both                                                                                                          | 6 (0.8%)             | 5 (0.9%)             |
| Advanced physician trainee?                                                                                   |                      |                      |
| No                                                                                                            | 565 (76.6%)          | 447 (77.5%)          |
| Yes                                                                                                           | 173 (23.4%)          | 130 (22.5%)          |
|                                                                                                               | Mean (SD; range)     |                      |
| Age (missing 2)                                                                                               | 44.68 (12.43; 20-85) | 44.26 (11.96; 26-84) |
| Abbreviations: ANZAN = Australia New Zealand Association of Neurologists; TNIP = Temporarily not in practice. |                      |                      |

Supplemental Table 6. Neurology specialisations and mean patient numbers/FTE fractions from 2020 ANZAN survey, restricted to 577 respondents who were active, adult neurologists, working in Australia.

|                    | Number of practitioners who work in a neurological specialty (out of 577)? | Number of NEW encounters per clinic (0.1 FTE) and week for specialisation | Number of REVIEW encounters seen per clinic (0.1 FTE) and week for specialisation | Number of inpatients seen per 0.1 FTE for specialisation | Average total FTE (public+private) for each specialisation |
|--------------------|----------------------------------------------------------------------------|---------------------------------------------------------------------------|-----------------------------------------------------------------------------------|----------------------------------------------------------|------------------------------------------------------------|
|                    | n (percentage)                                                             | mean (SD; range)                                                          |                                                                                   |                                                          |                                                            |
| Epilepsy           |                                                                            |                                                                           |                                                                                   |                                                          |                                                            |
|                    | 138 (23.9%)                                                                | 1.84 (1.89; 0-12)                                                         | 4.28 (5.71; 0-45)                                                                 | 1.12 (1.85; 0-12)                                        | 0.32 (0.27; 0-1)                                           |
| MS/neuroimmunology |                                                                            |                                                                           |                                                                                   |                                                          |                                                            |
|                    | 133 (23.1%)                                                                | 1.16 (1.19; 0-6)                                                          | 3.46 (3.67; 0-20)                                                                 | 0.42 (1.31; 0-12)                                        | 0.21 (0.17; 0-1)                                           |
| Neuromuscular      |                                                                            |                                                                           |                                                                                   |                                                          |                                                            |
|                    | 101 (17.5%)                                                                | 1.55 (1.86; 0-10)                                                         | 2.99 (3.94; 0-24)                                                                 | 0.20 (0.68; 0-5)                                         | 0.17 (0.15; 0.1-0.9)                                       |
| Movement disorders |                                                                            |                                                                           |                                                                                   |                                                          |                                                            |
|                    | 108 (18.7%)                                                                | 1.66 (1.83; 0-10)                                                         | 4.11 (6.35; 0-50)                                                                 | 0.57 (1.64; 0-10)                                        | 0.27 (0.23; 0-1)                                           |

|                                 |             |                   |                   |                   |                      |
|---------------------------------|-------------|-------------------|-------------------|-------------------|----------------------|
| Stroke                          |             |                   |                   |                   |                      |
|                                 | 153 (26.5%) | 1.50 (2.93; 0-30) | 1.86 (2.82; 0-20) | 3.81 (6.02; 0-36) | 0.33 (0.28; 0-1)     |
| Clinical neurophysiology        |             |                   |                   |                   |                      |
|                                 | 154 (26.7%) | 5.01 (5.14; 0-32) | 0.33 (1.22; 0-10) | 0.53 (1.42; 0-10) | 0.24 (0.22; 0-1)     |
| Cognitive/behavioural neurology |             |                   |                   |                   |                      |
|                                 | 43 (7.5%)   | 1.02 (1.18; 0-5)  | 2.09 (3.56; 0-20) | 0.77 (2.07; 0-12) | 0.17 (0.08; 0.1-0.3) |
| Headache                        |             |                   |                   |                   |                      |
|                                 | 94 (16.3%)  | 1.54 (1.56; 0-6)  | 3.35 (5.46; 0-45) | 0.49 (1.20; 0-6)  | 0.21 (0.22; 0-1)     |
| Neuro-ophthalmology             |             |                   |                   |                   |                      |
|                                 | 32 (5.6%)   | 0.91 (1.28; 0-5)  | 1.66 (2.18; 0-7)  | 0.16 (0.37; 0-1)  | 0.15 (0.14; 0-0.5)   |
| Neuro-otology                   |             |                   |                   |                   |                      |
|                                 | 29 (5.0%)   | 2.03 (2.85; 0-12) | 3.17 (5.99; 0-30) | 0.28 (0.53; 0-2)  |                      |
| General neurology               |             |                   |                   |                   |                      |
|                                 | 387 (67.1%) | 2.65 (3.83; 0-40) | 4.94 (6.95; 0-60) | 2.82 (4.61; 0-30) | 0.42 (0.31; 0-1)     |

|       |           |                   |                   |                  |                     |
|-------|-----------|-------------------|-------------------|------------------|---------------------|
| Other |           |                   |                   |                  |                     |
|       | 17 (3.0%) | 1.94 (3.29; 0-12) | 2.82 (5.78; 0-22) | 0.35 (1.22; 0-5) | 0.2 (0.13; 0.1-0.5) |

Supplemental Table 7. Estimation of supply and demand of neurological care in Australia in 2020 and 2034 including interventions.

|                                                     | 2020  | 2034  | +5 neurologists per year, 2022-2031 | +10 neurologists per year, 2022-2031 | +20 neurologists per year, 2022-2031 |
|-----------------------------------------------------|-------|-------|-------------------------------------|--------------------------------------|--------------------------------------|
| Supply of neurological care                         |       |       |                                     |                                      |                                      |
| Neurologists                                        | 620   | 896   | 935                                 | 973                                  | 1051                                 |
| Weeks/year                                          | 43    | 43    | 43                                  | 43                                   | 43                                   |
| Initial Pts per week (2.75 per clinic) <sup>a</sup> | 16.56 | 16.56 | 16.56                               | 16.56                                | 16.56                                |

|                                                    |              |              |              |              |              |
|----------------------------------------------------|--------------|--------------|--------------|--------------|--------------|
| Review Pts per week (5.49 per clinic) <sup>a</sup> | 32.94        | 32.94        | 32.94        | 32.94        | 32.94        |
|                                                    |              |              |              |              |              |
| Initial Pts/year <sup>b</sup>                      | 441,489.60   | 638,023.68   | 665,794.80   | 692,853.84   | 748,396.08   |
| Review Pts/year <sup>c</sup>                       | 878,180.40   | 1,269,112.32 | 1,324,352.70 | 1,378,176.66 | 1,488,657.42 |
|                                                    |              |              |              |              |              |
| Demand for neurological care <sup>d</sup>          |              |              |              |              |              |
| Initial encounters/year                            | 172,099.08   | 219,041.47   | 219,041.47   | 219,041.47   | 219,041.47   |
| Review encounters/year                             | 2,200,696.20 | 2,766,987.22 | 2,766,987.22 | 2,766,987.22 | 2,766,987.22 |
|                                                    |              |              |              |              |              |

|                                                                                                 |                  |                  |                  |                  |                  |
|-------------------------------------------------------------------------------------------------|------------------|------------------|------------------|------------------|------------------|
| Difference between supply and demand of neurological care <sup>d</sup>                          |                  |                  |                  |                  |                  |
| Initial encounters/year                                                                         | Demand fully met |
| Review encounters/year                                                                          | -1,322,515.80    | -1,497,874.90    | -1,442,634.52    | -1,388,810.56    | -1,278,329.80    |
|                                                                                                 |                  |                  |                  |                  |                  |
| Supply vs Demand based on Australia national disease-specific patient counts <sup>d</sup> , 10% |                  |                  |                  |                  |                  |

|                                                                                                                                                                                                                                                                                                                                                                                                                                                                                                                                                                                                                        |             |             |             |             |             |
|------------------------------------------------------------------------------------------------------------------------------------------------------------------------------------------------------------------------------------------------------------------------------------------------------------------------------------------------------------------------------------------------------------------------------------------------------------------------------------------------------------------------------------------------------------------------------------------------------------------------|-------------|-------------|-------------|-------------|-------------|
| Initial allocation first, then remaining capacity to Review                                                                                                                                                                                                                                                                                                                                                                                                                                                                                                                                                            |             |             |             |             |             |
| Initial encounters/year                                                                                                                                                                                                                                                                                                                                                                                                                                                                                                                                                                                                | -154,889.17 | -197,137.32 | -197,137.32 | -197,137.32 | -197,137.32 |
| Review encounters/year                                                                                                                                                                                                                                                                                                                                                                                                                                                                                                                                                                                                 | -898,236.11 | -881,755.37 | -798,743.87 | -717,860.87 | -551,837.87 |
|                                                                                                                                                                                                                                                                                                                                                                                                                                                                                                                                                                                                                        |             |             |             |             |             |
| <p>a. Initial and review patient numbers derived from 2020 ANZAN Member Survey.</p> <p>b. Patient capacity for Initial encounters estimated as: Number of neurologists <math>\times</math> FTE fraction <math>\times</math> Weeks/year <math>\times</math> # Initial Patients per week.</p> <p>c. Patient capacity for Review encounters estimated as: Number of neurologists <math>\times</math> FTE fraction <math>\times</math> Weeks/year <math>\times</math> # Review Patients per week.</p> <p>d. Estimated new and review patient load based on disease-specific patient counts as in Supplemental Table 1.</p> |             |             |             |             |             |



Supplemental Table 8. Estimation of durational supply and demand for neurological care in Australia, 2020 to 2034 with intervention scenarios.

|                                                     | 2020       | 2034       | +5 neurologists per year, 2022-2031 | +10 neurologists per year, 2022-2031 | +20 neurologists per year, 2022-2031 |
|-----------------------------------------------------|------------|------------|-------------------------------------|--------------------------------------|--------------------------------------|
| Supply of neurological care                         |            |            |                                     |                                      |                                      |
| Neurologists                                        | 620        | 896        | 935                                 | 973                                  | 1051                                 |
| Weeks/year                                          | 43         | 43         | 43                                  | 43                                   | 43                                   |
| Initial Pts per week (2.75 per clinic) <sup>a</sup> | 16.56      | 16.56      | 16.56                               | 16.56                                | 16.56                                |
| Review Pts per week (5.49 per clinic) <sup>a</sup>  | 32.94      | 32.94      | 32.94                               | 32.94                                | 32.94                                |
|                                                     |            |            |                                     |                                      |                                      |
| Initial encounters/year <sup>b</sup>                | 441,489.60 | 638,023.68 | 665,794.80                          | 692,853.84                           | 748,396.08                           |

|                                                                      |            |              |              |              |              |
|----------------------------------------------------------------------|------------|--------------|--------------|--------------|--------------|
| Review encounters/year <sup>c</sup>                                  | 878,180.40 | 1,269,112.32 | 1,324,352.70 | 1,378,176.66 | 1,488,657.42 |
|                                                                      |            |              |              |              |              |
| Patient Durational Supply, Hours (60 min per new, 30 min per review) |            |              |              |              |              |
| Initial encounters/year <sup>b</sup>                                 | 344,361.89 | 497,658.47   | 519,319.94   | 540,426.00   | 583,748.94   |
| Review encounters/year <sup>c</sup>                                  | 342,490.36 | 494,953.80   | 516,497.55   | 537,488.90   | 580,576.39   |
|                                                                      |            |              |              |              |              |

|                                                                                                                     |            |              |              |              |              |
|---------------------------------------------------------------------------------------------------------------------|------------|--------------|--------------|--------------|--------------|
| Durational demand for neurological care <sup>d</sup>                                                                |            |              |              |              |              |
| Initial encounters/year                                                                                             | 134,447.29 | 171,878.64   | 171,878.64   | 171,878.64   | 171,878.64   |
| Review encounters/year                                                                                              | 880,875.74 | 1,087,167.43 | 1,087,167.43 | 1,087,167.43 | 1,087,167.43 |
|                                                                                                                     |            |              |              |              |              |
| Supply vs 1-year average Durational Demand based on Australia national disease-specific patient counts <sup>d</sup> |            |              |              |              |              |

|                                                                                                                                                                                            |                  |                  |                  |                  |                  |
|--------------------------------------------------------------------------------------------------------------------------------------------------------------------------------------------|------------------|------------------|------------------|------------------|------------------|
| Initial encounters/year                                                                                                                                                                    | Demand fully met |
| Review encounters/year                                                                                                                                                                     | -538,385.39      | -592,213.62      | -570,669.87      | -549,678.53      | -506,591.03      |
|                                                                                                                                                                                            |                  |                  |                  |                  |                  |
| Supply vs 1-year average<br>Durational<br>Demand based on<br>Australia national<br>disease-specific<br>patient counts <sup>d</sup> ,<br>10% Initial<br>allocation first,<br>then remaining |                  |                  |                  |                  |                  |

|                                                                                                                                                                                                                                                                                                                                                                                                                                                                                                            |             |             |             |             |                  |
|------------------------------------------------------------------------------------------------------------------------------------------------------------------------------------------------------------------------------------------------------------------------------------------------------------------------------------------------------------------------------------------------------------------------------------------------------------------------------------------------------------|-------------|-------------|-------------|-------------|------------------|
| capacity to<br>Review                                                                                                                                                                                                                                                                                                                                                                                                                                                                                      |             |             |             |             |                  |
| Initial<br>encounters/year                                                                                                                                                                                                                                                                                                                                                                                                                                                                                 | -121,002.56 | -154,007.67 | -154,007.67 | -154,007.67 | -154,007.67      |
| Review<br>encounters/year                                                                                                                                                                                                                                                                                                                                                                                                                                                                                  | -207,468.23 | -111,667.12 | -68,461.89  | -26,364.50  | Demand fully met |
| <p>a. Initial and review patient numbers derived from 2020 ANZAN Member Survey.</p> <p>b. Patient capacity for Initial encounters estimated as: Number of neurologists x FTE fraction x Weeks/year x # Initial Patients per week.</p> <p>c. Patient capacity for Review encounters estimated as: Number of neurologists x FTE fraction x Weeks/year x # Review Patients per week.</p> <p>d. Estimated new and review patient load based on disease-specific patient counts as in Supplemental Table 1.</p> |             |             |             |             |                  |

Supplemental Table 9. Neurology patient supply and demand estimation, regional Australia, 2020 to 2034, updated prevalence and incidence-based demand estimates with intervention scenarios.

|                                                     | 2020  | 2034  | +2 neurologists per year, 2022-2031 | +5 neurologists per year, 2022-2031 | +10 neurologists per year, 2022-2031 |
|-----------------------------------------------------|-------|-------|-------------------------------------|-------------------------------------|--------------------------------------|
| Supply of neurological care                         |       |       |                                     |                                     |                                      |
| Neurologists                                        | 25    | 33    | 46                                  | 65                                  | 97                                   |
| Weeks/year                                          | 43    | 43    | 43                                  | 43                                  | 43                                   |
| Initial Pts per week (2.75 per clinic) <sup>a</sup> | 16.56 | 16.56 | 16.56                               | 16.56                               | 16.56                                |
| Review Pts per week (5.49 per clinic) <sup>a</sup>  | 32.94 | 32.94 | 32.94                               | 32.94                               | 32.94                                |
|                                                     |       |       |                                     |                                     |                                      |

|                                                        |            |            |            |            |            |
|--------------------------------------------------------|------------|------------|------------|------------|------------|
| Initial encounters/year <sup>b</sup>                   | 17,802.00  | 23,498.64  | 32,755.68  | 46,285.20  | 69,071.76  |
| Review encounters/year <sup>c</sup>                    | 35,410.50  | 46,741.86  | 65,155.32  | 92,067.30  | 137,392.74 |
|                                                        |            |            |            |            |            |
| Demand for neurological care <sup>d</sup>              |            |            |            |            |            |
| Initial encounters/year                                | 53,350.71  | 67,902.86  | 67,902.86  | 67,902.86  | 67,902.86  |
| Review encounters/year                                 | 682,215.82 | 857,766.04 | 857,766.04 | 857,766.04 | 857,766.04 |
|                                                        |            |            |            |            |            |
| Supply vs Demand based on Australian national disease- |            |            |            |            |            |

|                                                                                                                                                              |             |             |             |             |                  |
|--------------------------------------------------------------------------------------------------------------------------------------------------------------|-------------|-------------|-------------|-------------|------------------|
| specific patient counts <sup>d</sup> .                                                                                                                       |             |             |             |             |                  |
| Initial encounters/year                                                                                                                                      | -35,548.71  | -44,404.22  | -35,147.18  | -21,617.66  | Demand fully met |
| Review encounters/year                                                                                                                                       | -646,805.32 | -811,024.18 | -792,610.72 | -765,698.74 | -720,373.30      |
|                                                                                                                                                              |             |             |             |             |                  |
| Supply vs Demand based on Australian national disease-specific patient counts <sup>d</sup> , 10% Initial allocation first, then remaining capacity to Review |             |             |             |             |                  |



|                                                                                                                                                                                                                                                                                                                                                                                                                                                                                                            |             |             |             |             |             |
|------------------------------------------------------------------------------------------------------------------------------------------------------------------------------------------------------------------------------------------------------------------------------------------------------------------------------------------------------------------------------------------------------------------------------------------------------------------------------------------------------------|-------------|-------------|-------------|-------------|-------------|
| Initial encounters/year                                                                                                                                                                                                                                                                                                                                                                                                                                                                                    | -48,015.64  | -61,112.57  | -61,112.57  | -61,112.57  | -61,112.57  |
| Review encounters/year                                                                                                                                                                                                                                                                                                                                                                                                                                                                                     | -634,356.88 | -794,315.82 | -766,645.32 | -726,203.82 | -658,091.82 |
| <p>a. Initial and review patient numbers derived from 2020 ANZAN Member Survey.</p> <p>b. Patient capacity for Initial encounters estimated as: Number of neurologists x FTE fraction x Weeks/year x # Initial Patients per week.</p> <p>c. Patient capacity for Review encounters estimated as: Number of neurologists x FTE fraction x Weeks/year x # Review Patients per week.</p> <p>d. Estimated new and review patient load based on disease-specific patient counts as in Supplemental Table 1.</p> |             |             |             |             |             |

Supplemental Table 10. Estimation of durational supply and demand for neurological care in regional Australia, 2020 to 2034, with intervention scenarios.

|  |      |      |                                     |                                     |                                      |
|--|------|------|-------------------------------------|-------------------------------------|--------------------------------------|
|  | 2020 | 2034 | +2 neurologists per year, 2022-2031 | +5 neurologists per year, 2022-2031 | +10 neurologists per year, 2022-2031 |
|--|------|------|-------------------------------------|-------------------------------------|--------------------------------------|

|                                                     |           |           |           |           |            |
|-----------------------------------------------------|-----------|-----------|-----------|-----------|------------|
| Supply of neurological care                         |           |           |           |           |            |
| Neurologists                                        | 25        | 33        | 46        | 65        | 97         |
| Weeks/year                                          | 43        | 43        | 43        | 43        | 43         |
| Initial Pts per week (2.75 per clinic) <sup>a</sup> | 16.56     | 16.56     | 16.56     | 16.56     | 16.56      |
| Review Pts per week (5.49 per clinic) <sup>a</sup>  | 32.94     | 32.94     | 32.94     | 32.94     | 32.94      |
|                                                     |           |           |           |           |            |
| Initial encounters/year <sup>b</sup>                | 17,802.00 | 23,498.64 | 32,755.68 | 46,285.20 | 69,071.76  |
| Review encounters/year <sup>c</sup>                 | 35,410.50 | 46,741.86 | 65,155.32 | 92,067.30 | 137,392.74 |
|                                                     |           |           |           |           |            |

|                                                                               |           |           |           |           |           |
|-------------------------------------------------------------------------------|-----------|-----------|-----------|-----------|-----------|
| Patient Durational<br>Supply, Hours (60<br>min per new, 30<br>min per review) |           |           |           |           |           |
| Initial<br>encounters/year <sup>b</sup>                                       | 17,802.00 | 23,498.64 | 32,755.68 | 46,285.20 | 69,071.76 |
| Review<br>encounters/year <sup>c</sup>                                        | 17,705.25 | 23,370.93 | 32,577.66 | 46,033.65 | 68,696.37 |
|                                                                               |           |           |           |           |           |
| Durational demand<br>for neurological<br>care <sup>d</sup>                    |           |           |           |           |           |
| Initial<br>encounters/year                                                    | 13,885.56 | 18,328.94 | 25,549.43 | 36,102.46 | 53,875.97 |
| Review<br>encounters/year                                                     | 13,810.10 | 18,229.33 | 25,410.57 | 35,906.25 | 53,583.17 |

|                                                                                                                                      |             |             |             |             |                  |
|--------------------------------------------------------------------------------------------------------------------------------------|-------------|-------------|-------------|-------------|------------------|
|                                                                                                                                      |             |             |             |             |                  |
| Supply vs 1-year<br>average Durational<br>Demand based on<br>Australia national<br>disease-specific<br>patient counts <sup>d</sup> . |             |             |             |             |                  |
| Initial<br>encounters/year                                                                                                           | -27,793.10  | -34,718.15  | -27,497.66  | -16,944.63  | Demand fully met |
| Review<br>encounters/year                                                                                                            | -259,261.39 | -318,792.58 | -311,611.33 | -301,115.66 | -283,438.73      |
|                                                                                                                                      |             |             |             |             |                  |
| Supply vs 1-year<br>average Durational<br>Demand based on<br>Australia national                                                      |             |             |             |             |                  |

|                                                                                                                                                                                                                                                                                                                                                                                                                                                                                                            |             |             |             |             |             |
|------------------------------------------------------------------------------------------------------------------------------------------------------------------------------------------------------------------------------------------------------------------------------------------------------------------------------------------------------------------------------------------------------------------------------------------------------------------------------------------------------------|-------------|-------------|-------------|-------------|-------------|
| disease-specific patient counts <sup>d</sup> , 10% Initial allocation first, then remaining capacity to Review                                                                                                                                                                                                                                                                                                                                                                                             |             |             |             |             |             |
| Initial encounters/year                                                                                                                                                                                                                                                                                                                                                                                                                                                                                    | -37,510.79  | -47,742.38  | -47,742.38  | -47,742.38  | -47,742.38  |
| Review encounters/year                                                                                                                                                                                                                                                                                                                                                                                                                                                                                     | -249,543.69 | -305,768.35 | -291,366.61 | -270,317.91 | -234,867.47 |
| <p>a. Initial and review patient numbers derived from 2020 ANZAN Member Survey.</p> <p>b. Patient capacity for Initial encounters estimated as: Number of neurologists x FTE fraction x Weeks/year x # Initial Patients per week.</p> <p>c. Patient capacity for Review encounters estimated as: Number of neurologists x FTE fraction x Weeks/year x # Review Patients per week.</p> <p>d. Estimated new and review patient load based on disease-specific patient counts as in Supplemental Table 1.</p> |             |             |             |             |             |

*Supplemental Table 11. Estimation of patient supply/demand for Australia, 2020, assessing different fractions of Initial encounter demand allocation.*

|                                   |                   | Allocation of Initial demand of neurology care before remaining capacity preferentially allocated to<br>Review demand of neurology care |              |              |              |              |
|-----------------------------------|-------------------|-----------------------------------------------------------------------------------------------------------------------------------------|--------------|--------------|--------------|--------------|
|                                   | Simple difference | 10%                                                                                                                                     | 20%          | 30%          | 40%          | 50%          |
| Supply vs<br>demand               |                   |                                                                                                                                         |              |              |              |              |
| Initial met                       | 172,099.08        | 17,209.91                                                                                                                               | 34,419.82    | 51,629.72    | 68,839.63    | 86,049.54    |
| Initial not met                   | 0.00              | 154,889.17                                                                                                                              | 137,679.26   | 120,469.35   | 103,259.45   | 86,049.54    |
| Review met                        | 878,180.4         | 1,302,400.46                                                                                                                            | 1,285,130.92 | 1,267,861.37 | 1,250,591.83 | 1,233,322.29 |
| Review not<br>met                 | -1,322,515.80     | -898,295.74                                                                                                                             | -915,565.28  | -932,834.83  | -950,104.37  | -967,373.91  |
|                                   |                   |                                                                                                                                         |              |              |              |              |
| Durational<br>supply vs<br>demand |                   |                                                                                                                                         |              |              |              |              |
| Initial met                       | 134,447.29        | 13,444.73                                                                                                                               | 26,889.46    | 40,334.19    | 53,778.92    | 67,223.64    |
| Initial not met                   | 0.00              | 121,002.56                                                                                                                              | 107,557.83   | 94,113.10    | 80,668.37    | 67,223.64    |

|                |             |             |             |             |             |             |
|----------------|-------------|-------------|-------------|-------------|-------------|-------------|
| Review met     | 342,490.36  | 673,407.52  | 659,962.79  | 646,518.06  | 633,073.33  | 619,628.60  |
| Review not met | -538,385.39 | -207,468.23 | -220,912.96 | -234,357.69 | -247,802.41 | -261,247.14 |
|                |             |             |             |             |             |             |

## References

1. Dubey D, Pittock SJ, Kelly CR, et al. Autoimmune encephalitis epidemiology and a comparison to infectious encephalitis. *Annals of neurology* 2018;83(1):166-77. doi: 10.1002/ana.25131 [published Online First: 2018/01/03]
2. Feigin VL, Vos T, Alahdab F, et al. Burden of Neurological Disorders Across the US From 1990-2017: A Global Burden of Disease Study. *JAMA neurology* 2021;78(2):165-76. doi: 10.1001/jamaneurol.2020.4152 [published Online First: 2020/11/03]
3. Dewan MC, Rattani A, Gupta S, et al. Estimating the global incidence of traumatic brain injury. *Journal of neurosurgery* 2018:1-18. doi: 10.3171/2017.10.Jns17352 [published Online First: 2018/04/28]
4. Frost RB, Farrer TJ, Primosch M, et al. Prevalence of traumatic brain injury in the general adult population: a meta-analysis. *Neuroepidemiology* 2013;40(3):154-9. doi: 10.1159/000343275 [published Online First: 2012/12/22]
5. Broers MC, Bunschoten C, Nieboer D, et al. Incidence and Prevalence of Chronic Inflammatory Demyelinating Polyradiculoneuropathy: A Systematic Review and Meta-Analysis. *Neuroepidemiology* 2019;52(3-4):161-72. doi: 10.1159/000494291 [published Online First: 2019/01/23]
6. Fiest KM, Sauro KM, Wiebe S, et al. Prevalence and incidence of epilepsy: A systematic review and meta-analysis of international studies. *Neurology* 2017;88(3):296-303. doi: 10.1212/wnl.0000000000003509 [published Online First: 2016/12/18]
7. Garrett AR, Hodges SD, Stahlman S. Epidemiology of functional neurological disorder, active component, U.S. Armed Forces, 2000-2018. *Msmr* 2020;27(7):16-22. [published Online First: 2020/07/30]
8. Sejvar JJ, Baughman AL, Wise M, et al. Population incidence of Guillain-Barré syndrome: a systematic review and meta-analysis. *Neuroepidemiology* 2011;36(2):123-33. doi: 10.1159/000324710 [published Online First: 2011/03/23]



9. Bragazzi NL, Kolahi AA, Nejadghaderi SA, et al. Global, regional, and national burden of Guillain-Barré syndrome and its underlying causes from 1990 to 2019. *Journal of neuroinflammation* 2021;18(1):264. doi: 10.1186/s12974-021-02319-4 [published Online First: 2021/11/13]
10. Lyngberg AC, Rasmussen BK, Jørgensen T, et al. Incidence of primary headache: a Danish epidemiologic follow-up study. *American journal of epidemiology* 2005;161(11):1066-73. doi: 10.1093/aje/kwi139 [published Online First: 2005/05/20]
11. Burch RC, Buse DC, Lipton RB. Migraine: Epidemiology, Burden, and Comorbidity. *Neurologic clinics* 2019;37(4):631-49. doi: 10.1016/j.ncl.2019.06.001 [published Online First: 2019/09/30]
12. GBD 2016 Motor Neuron Disease Collaborators. Global, regional, and national burden of motor neuron diseases 1990-2016: a systematic analysis for the Global Burden of Disease Study 2016. *The Lancet Neurology* 2018;17(12):1083-97. doi: 10.1016/s1474-4422(18)30404-6 [published Online First: 2018/11/10]
13. Campbell JA, Simpson S, Jr., Ahmad H, et al. Change in multiple sclerosis prevalence over time in Australia 2010-2017 utilising disease-modifying therapy prescription data. *Multiple sclerosis (Houndmills, Basingstoke, England)* 2019;26(11):1315-28. doi: 10.1177/1352458519861270 [published Online First: 2019/07/28]
14. Carr AS, Cardwell CR, McCarron PO, et al. A systematic review of population based epidemiological studies in Myasthenia Gravis. *BMC neurology* 2010;10:46. doi: 10.1186/1471-2377-10-46 [published Online First: 2010/06/23]
15. Meyer A, Meyer N, Schaeffer M, et al. Incidence and prevalence of inflammatory myopathies: a systematic review. *Rheumatology (Oxford, England)* 2015;54(1):50-63. doi: 10.1093/rheumatology/keu289 [published Online First: 2014/07/30]
16. Satizabal CL, Beiser AS, Chouraki V, et al. Incidence of Dementia over Three Decades in the Framingham Heart Study. *The New England journal of medicine* 2016;374(6):523-32. doi: 10.1056/NEJMoa1504327 [published Online First: 2016/02/11]
17. Akushevich I, Yashkin AP, Kravchenko J, et al. Time Trends in the Prevalence of Neurocognitive Disorders and Cognitive Impairment in the United States: The Effects of Disease Severity and Improved Ascertainment. *Journal of Alzheimer's disease : JAD* 2018;64(1):137-48. doi: 10.3233/jad-180060 [published Online First: 2018/06/06]
18. Braithwaite T, Subramanian A, Petzold A, et al. Trends in Optic Neuritis Incidence and Prevalence in the UK and Association With Systemic and Neurologic Disease. *JAMA neurology* 2020;77(12):1514-23. doi: 10.1001/jamaneurol.2020.3502 [published Online First: 2020/10/06]
19. Dieleman JP, Kerklaan J, Huygen F, et al. Incidence rates and treatment of neuropathic pain conditions in the general population. *Pain* 2008;137(3):681-88. doi: 10.1016/j.pain.2008.03.002 [published Online First: 2008/04/29]
20. Yawn BP, Wollan PC, Weingarten TN, et al. The prevalence of neuropathic pain: clinical evaluation compared with screening tools in a community population. *Pain medicine (Malden, Mass)* 2009;10(3):586-93. doi: 10.1111/j.1526-4637.2009.00588.x [published Online First: 2009/04/01]
21. Ou Z, Pan J, Tang S, et al. Global Trends in the Incidence, Prevalence, and Years Lived With Disability of Parkinson's Disease in 204 Countries/Territories From 1990 to 2019. *Frontiers in public health* 2021;9:776847. doi: 10.3389/fpubh.2021.776847 [published Online First: 2021/12/25]
22. Asplund M, Nilsson M, Jacobsson A, et al. Incidence of traumatic peripheral nerve injuries and amputations in Sweden between 1998 and 2006. *Neuroepidemiology* 2009;32(3):217-28. doi: 10.1159/000197900 [published Online First: 2009/01/29]

23. Hanewinckel R, van Oijen M, Ikram MA, et al. The epidemiology and risk factors of chronic polyneuropathy. *European journal of epidemiology* 2016;31(1):5-20. doi: 10.1007/s10654-015-0094-6 [published Online First: 2015/12/25]
24. Kruja J, Beghi E, Zerbi D, et al. High prevalence of major neurological disorders in two Albanian communities: results of a door-to-door survey. *Neuroepidemiology* 2012;38(3):138-47. doi: 10.1159/000336348 [published Online First: 2012/03/22]
25. Sleep Health Foundation. Rise and try to shine: The social and economic cost of sleep disorders in Australia, 2021.
26. Rogers AE, Stahlman S, Hunt DJ, et al. Obstructive sleep apnea and associated attrition, active component, U.S. Armed Forces, January 2004-May 2016. *Msmr* 2016;23(10):2-11. [published Online First: 2016/10/30]
27. Perlis ML, Vargas I, Ellis JG, et al. The Natural History of Insomnia: the incidence of acute insomnia and subsequent progression to chronic insomnia or recovery in good sleeper subjects. *Sleep* 2020;43(6) doi: 10.1093/sleep/zsz299 [published Online First: 2019/12/19]
28. O'Connor P. Incidence and patterns of spinal cord injury in Australia. *Accident; analysis and prevention* 2002;34(4):405-15. doi: 10.1016/s0001-4575(01)00036-7 [published Online First: 2002/06/18]
29. GBD 2016 Motor Neuron Disease Collaborators. Global, regional, and national burden of stroke and its risk factors, 1990-2019: a systematic analysis for the Global Burden of Disease Study 2019. *The Lancet Neurology* 2021;20(10):795-820. doi: 10.1016/s1474-4422(21)00252-0 [published Online First: 2021/09/07]
30. Bhat A, Naguwa S, Cheema G, et al. The epidemiology of transverse myelitis. *Autoimmunity reviews* 2010;9(5):A395-9. doi: 10.1016/j.autrev.2009.12.007 [published Online First: 2009/12/29]
31. Laakso SM, Hekali O, Kurdo G, et al. Trigeminal neuralgia in multiple sclerosis: Prevalence and association with demyelination. *Acta neurologica Scandinavica* 2020;142(2):139-44. doi: 10.1111/ane.13243 [published Online First: 2020/03/19]
32. Manzoni GC, Torelli P. Epidemiology of typical and atypical craniofacial neuralgias. *Neurological sciences : official journal of the Italian Neurological Society and of the Italian Society of Clinical Neurophysiology* 2005;26 Suppl 2:s65-7. doi: 10.1007/s10072-005-0410-0 [published Online First: 2005/06/01]
33. Royal Australasian College of Physicians. RACP Member Statistics and Insights, 2020. Sydney, 2020.
34. Royal Australasian College of Physicians. RACP Member Statistics and Insights, 2019. Sydney, 2019.
